# Supplementary material
Source: ML conference proceedings conference paper supplement (https://openaccess.thecvf.com/content/ICCV_2019/html/Wu_SparseMask_Differentiable_Connectivity_ICCV_2019_paper.html)
Supplement: Supplementary file 1 [file Wu_SparseMask_Differentiable_Connectivity_ICCV_2019_supplemental.pdf]

# SparseMask: Differentiable Connectivity Learning for Dense Image Prediction

## Supplementary Material

Huikai Wu\* Junge Zhang Kaiqi Huang†  
 Institute of Automation, Chinese Academy of Sciences  
 University of Chinese Academy of Sciences  
 {huikai.wu, jgzhang, kaiqi.huang}@nlpr.ia.ac.cn

### 1. Theorems

We present two theorems in Section 3.1.2 (main text), of which the proofs are given in this section.

**Theorem 1.** *Concatenating the features and then applying convolution is equal to applying convolution to each feature and then take a summation.*

*Proof.* Given  $M$  input features  $F_{in}^m$  with shape  $N \times C_{in}^m \times H \times W$ , the concatenated feature is noted as  $F_{in}$  with shape  $N \times C_{in} \times H \times W$ , where  $C_{in} = \sum_{m=0}^{M-1} C_{in}^m$ . The corresponding convolution kernel is noted as  $W$  with shape  $C_{out} \times C_{in} \times KH \times KW$ , which can be split into  $M$  weights  $W^m$  with shape  $C_{out} \times C_{in}^m \times KH \times KW$ . The output feature  $F_{out}$  is represented as following:

$$\begin{aligned}
 F_{out}[n, c_{out}, h, w] &= conv(F_{in}, W)[n, c_{out}, h, w] \\
 &= \sum_{kh, kw} \sum_{c_{in}=0}^{C_{in}-1} W[c_{out}, c_{in}, kh, kw] F_{in}[n, c_{in}, h + kh, w + kw] \\
 &= \sum_{kh, kw} \sum_{m=0}^{M-1} \sum_{c_{in}=0}^{C_{in}^m-1} W^m[c_{out}, c_{in}, kh, kw] F_{in}^m[n, c_{in}, h + kh, w + kw] \\
 &= \sum_{m=0}^{M-1} \sum_{kh, kw} \sum_{c_{in}=0}^{C_{in}^m-1} W^m[c_{out}, c_{in}, kh, kw] F_{in}^m[n, c_{in}, h + kh, w + kw] \\
 &= \sum_{m=0}^{M-1} conv(F_{in}^m, W^m)[n, c_{out}, h, w].
 \end{aligned} \tag{1}$$

□

**Theorem 2.** *The order of bilinear upsampling and point-wise convolution is changeable.*

*Proof.* The input feature is  $F_{in}$  with shape  $N \times C_{in} \times H_{in} \times W_{in}$ , while the corresponding convolution kernel is  $W$  with

---

\*This paper is based on the results obtained from the author's internship at Preferred Networks, Inc.

† Also with CAS Center for Excellence in Brain Science and Intelligence Technology.

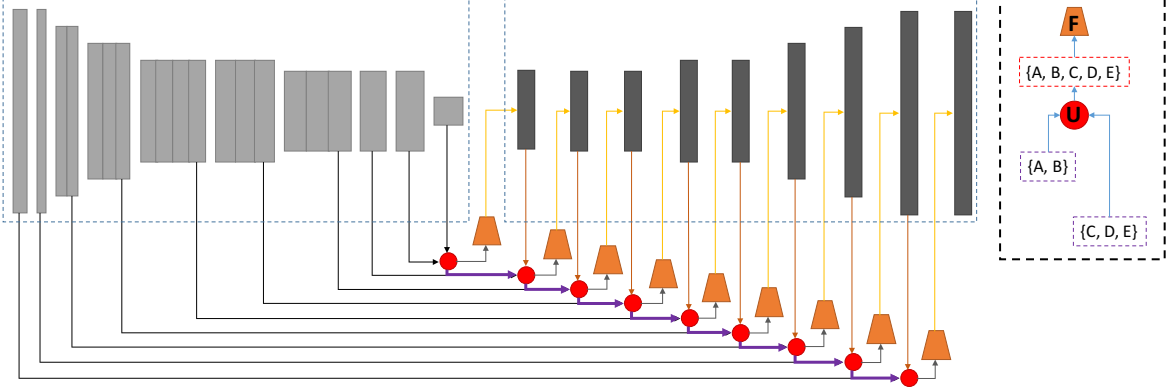

Figure 1: **Fully Dense Network based on MobileNet-V2** [2]. The inputs to the red circle (U) are multiple feature sets, while the output is the union of all the sets. F is the decoder stage, which takes a feature set as the input. Best viewed in color.

shape  $C_{out} \times C_{in} \times 1 \times 1$ . The output features  $F_{out}$  is then represented as following:

$$\begin{aligned}
 F_{out}[n, c_{out}, h_{out}, w_{out}] &= conv(f_{\uparrow}(F_{in}), W)[n, c_{out}, h_{out}, w_{out}] \\
 &= \sum_{c_{in}} W[c_{out}, c_{in}, 0, 0] f_{\uparrow}(F_{in})[n, c_{in}, h_{out}, w_{out}] \\
 &= \sum_{c_{in}} W[c_{out}, c_{in}, 0, 0] \sum_{i=0}^3 |h_{in} - h_{in}^i| |w_{in} - w_{in}^i| F_{in}[n, c_{in}, h_{in}^i, w_{in}^i] \\
 &= \sum_{i=0}^3 \sum_{c_{in}} W[c_{out}, c_{in}, 0, 0] |h_{in} - h_{in}^i| |w_{in} - w_{in}^i| F_{in}[n, c_{in}, h_{in}^i, w_{in}^i] \\
 &= \sum_{i=0}^3 |h_{in} - h_{in}^i| |w_{in} - w_{in}^i| \sum_{c_{in}} W[c_{out}, c_{in}, 0, 0] F_{in}[n, c_{in}, h_{in}^i, w_{in}^i] \\
 &= \sum_{i=0}^3 |h_{in} - h_{in}^i| |w_{in} - w_{in}^i| conv(F_{in}, W)[n, c_{out}, h_{in}^i, w_{in}^i] \\
 &= f_{\uparrow}(conv(F_{in}, W))[n, c_{out}, h_{out}, w_{out}],
 \end{aligned} \tag{2}$$

where  $f_{\uparrow}(\cdot)$  is bilinear upsampling,  $h_{in} = h_{out}/H_{out} \times H_{in}$  and  $w_{in} = w_{out}/W_{out} \times W_{in}$ .  $h_{in}^i$  and  $w_{in}^i$  is calculated as follows:

$$\begin{aligned}
 h_{in}^0 &= \lfloor h_{in} \rfloor, w_{in}^0 = \lfloor w_{in} \rfloor; h_{in}^1 = \lceil h_{in} \rceil, w_{in}^1 = \lfloor w_{in} \rfloor \\
 h_{in}^2 &= \lfloor h_{in} \rfloor, w_{in}^2 = \lceil w_{in} \rceil; h_{in}^3 = \lceil h_{in} \rceil, w_{in}^3 = \lceil w_{in} \rceil.
 \end{aligned} \tag{3}$$

□

## 2. Fully Dense Network based on MobileNet-V2

Figure 1 presents the Fully Dense Network based on MobileNet-V2. The inputs to the red circle (U) are multiple feature sets, while the output is the union of all the sets. F is the decoder stage, which takes a feature set as the input.

## 3. Visual Results

The visual results for experiments in Section 5 (main text) are shown in Figure 2.

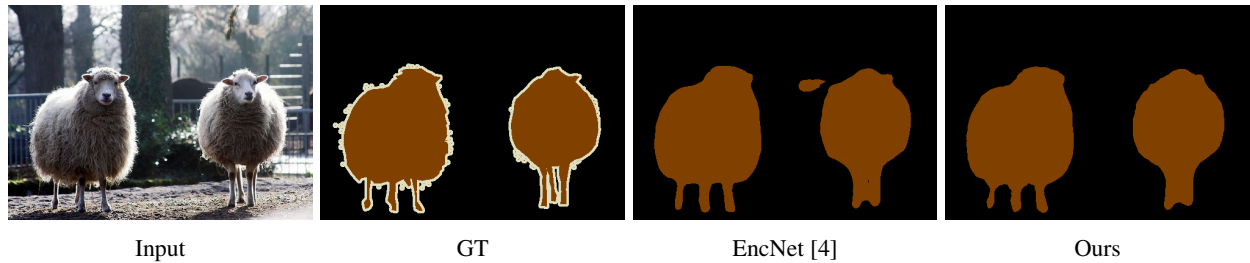

(a) Semantic Segmentation: PASCAL VOC 2012

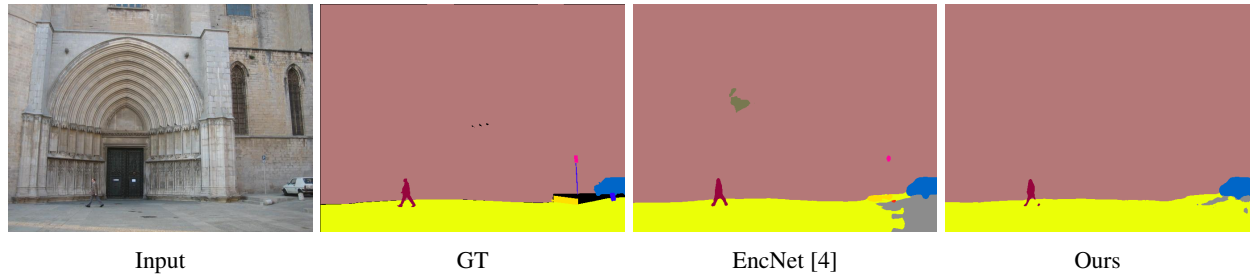

(b) Semantic Segmentation: ADE20K

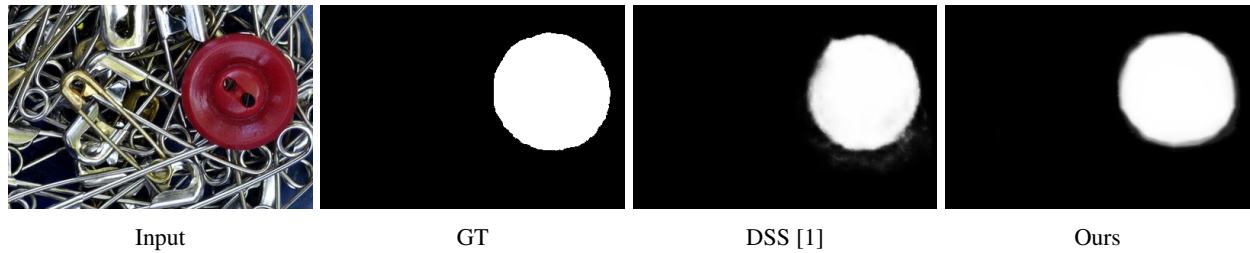

(c) Saliency Detection

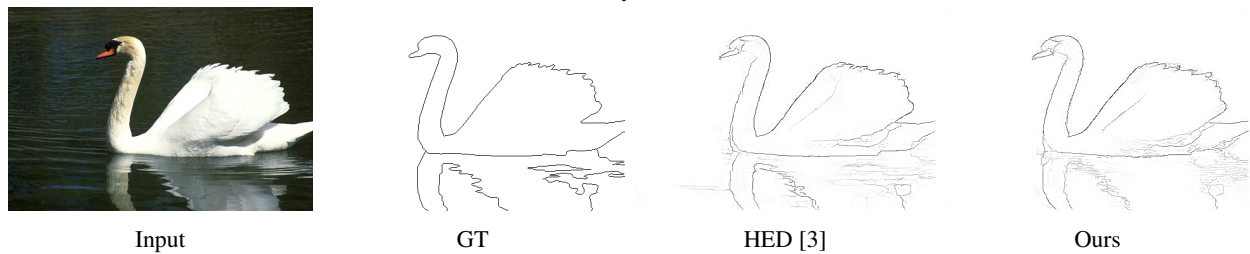

(d) Edge Detection

Figure 2: **Qualitative Results.** Our method is not only quantitatively but also qualitatively comparable to the baseline method.

## References

- [1] Qibin Hou, Ming-Ming Cheng, Xiaowei Hu, Ali Borji, Zhuowen Tu, and Philip Torr. Deeply supervised salient object detection with short connections. In *CVPR*, 2017.
- [2] Mark Sandler, Andrew Howard, Menglong Zhu, Andrey Zhmoginov, and Liang-Chieh Chen. Mobilenetv2: Inverted residuals and linear bottlenecks. In *CVPR*, 2018.
- [3] Saining Xie and Zhuowen Tu. Holistically-nested edge detection. In *ICCV*, 2015.
- [4] Hang Zhang, Kristin Dana, Jianping Shi, Zhongyue Zhang, Xiaoqiang Wang, Amrith Tyagi, and Amit Agrawal. Context encoding for semantic segmentation. In *CVPR*, 2018.
